# Supplementary material for: Vitamin D Levels Are Associated with Cardiovascular Disease Events but Not with Cardiovascular Disease or Overall Mortality: A Prospective Population-Based Study
Source: MDPI journal article supplement (doi:10.3390/nu15184046), 2023-09-18
Supplement: s1 [file s1]

## Supplementary information

**Supplementary Table S1:** characteristics of included and excluded participants, CoLaus study, Lausanne, Switzerland.

|                                      | Included    | Excluded   | P-value |
|--------------------------------------|-------------|------------|---------|
| N                                    | 5684        | 1049       |         |
| Women (%)                            | 3049 (53.6) | 495 (47.2) | <0.001  |
| Age (years)                          | 52.5 ± 10.7 | 53.2 ± 11  | 0.067   |
| Born in Switzerland (%)              | 3552 (62.5) | 479 (45.8) | <0.001  |
| Marital status: with a partner (%)   | 3808 (67.0) | 704 (67.5) | 0.757   |
| Educational level (%)                |             |            | <0.001  |
| High                                 | 1153 (20.3) | 167 (16.1) |         |
| Middle                               | 1425 (25.1) | 200 (19.3) |         |
| Low                                  | 3106 (54.6) | 668 (64.5) |         |
| Smoking categories (%)               |             |            | 0.119   |
| Never                                | 2321 (40.8) | 411 (39.4) |         |
| Former                               | 1859 (32.7) | 324 (31.1) |         |
| Current                              | 1504 (26.5) | 308 (29.5) |         |
| Body mass index (kg/m <sup>2</sup> ) | 25.6 ± 4.4  | 26.8 ± 4.9 | <0.001  |
| BMI categories (%)                   |             |            | <0.001  |
| Normal                               | 2830 (49.8) | 407 (38.9) |         |
| Overweight                           | 2059 (36.2) | 403 (38.5) |         |
| Obese                                | 795 (14.0)  | 236 (22.6) |         |
| Hypertension (%)                     | 1983 (34.9) | 517 (49.6) | <0.001  |
| Diabetes (%)                         | 334 (5.9)   | 102 (9.9)  | <0.001  |
| SCORE risk categories (%)            |             |            | <0.001  |
| Low-moderate                         | 3446 (61.2) | 495 (48.8) |         |
| High                                 | 1503 (26.7) | 253 (24.9) |         |
| Very high                            | 678 (12.1)  | 142 (14.0) |         |
| Previous CVD                         | -           | 125 (12.3) |         |
| Vitamin D categories (%)             |             |            | <0.001  |
| Normal                               | 695 (12.2)  | 88 (9.1)   |         |
| Insufficiency                        | 1760 (31.0) | 250 (25.8) |         |
| Deficiency                           | 3229 (56.8) | 632 (65.2) |         |

BMI, body mass index. Results are expressed as number of participants (column percentage) for categorical variables and mean ± standard deviation for continuous variables. Between-group comparisons performed using chi-square for categorical variables and by student's t-test for continuous variables.
