# Supplementary figures and images for: Vitamin D Levels Are Associated with Cardiovascular Disease Events but Not with Cardiovascular Disease or Overall Mortality: A Prospective Population-Based Study
Source: MDPI journal article supplement (doi:10.3390/nu15184046), 2023-09-18

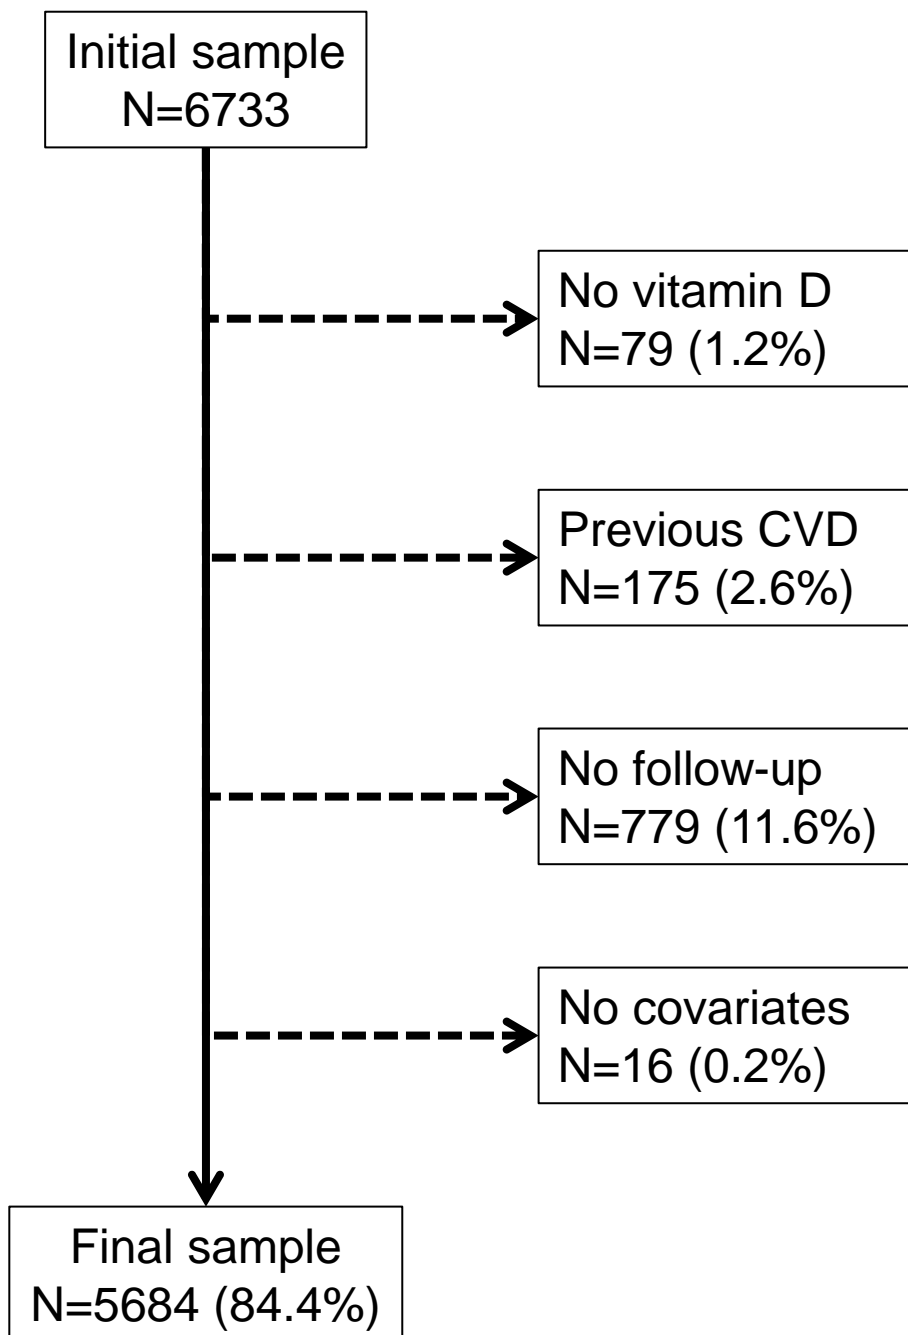

Supplement: s1 [file s1]
